# Supplementary material
Source: MDPI journal article supplement (https://www.mdpi.com/2073-4395/13/5/1327)
Supplement: s1 [file s1]

Archive with 3 entries (3 files):
- Figure_S1.pdf
- Figure_S2.pdf
- Supplementary material chart..pdf
